# Supplementary material for: Redox-sensing regulator Rex regulates aerobic metabolism, morphological differentiation, and avermectin production in Streptomyces avermitilis
Source: PubMed Central journal article supplement (PMC5355995; doi:10.1038/srep44567), 2017-03-17
Supplement: srep44567-s1.pdf [file srep44567-s1.pdf]

**Redox-sensing regulator Rex regulates aerobic metabolism,  
morphological differentiation, and avermectin production in  
*Streptomyces avermitilis***

Xingchao Liu, Yaqing Cheng, Mengya Lyu, Ying Wen, Yuan Song, Zhi Chen, & Jilun Li

State Key Laboratory of Agro-biotechnology and MOA Key Laboratory of Soil Microbiology,  
College of Biological Sciences, China Agricultural University, Beijing 100193, China.  
Correspondence and requests for materials should be addressed to Z.C. (email:  
chenzhi@cau.edu.cn)

**Supplementary Table 1. Primers used in this study**

| Purpose                            | Primer                             | Sequence (5'--3') <sup>a</sup>                   |
|------------------------------------|------------------------------------|--------------------------------------------------|
| For construction of Drex mutant    | rex-up-Fw                          | CCCAAGCTTCATCACCCAGGACGCGGAG ( <i>Hind</i> III)  |
|                                    | rex-up-Rev                         | CGCGGATCCCTCGGAGGTACAGCGGAAGC ( <i>Bam</i> HI)   |
|                                    | rex-dw-Fw                          | CGCGGATCCCTCACCTCCATCCTGAACTTCG ( <i>Bam</i> HI) |
|                                    | rex-dw-Rev                         | CCGGAATCCCTCGCCCACGACCATC ( <i>Eco</i> RI)       |
|                                    | rex-V-Fw                           | GGTGAGAATGGCCGACATGAGT                           |
|                                    | rex-V-Rev                          | AACAGGTCGTTGAGGAGCCGT                            |
|                                    | rex-V2-Fw                          | TGTGGGCTACGACGTGCGAG                             |
|                                    | rex-V2-Rev                         | AGCTCGTCCGTGTGCTGG                               |
|                                    | For complementation of Drex mutant | rex-E-Fw                                         |
| rex-E-Rev                          |                                    | GCTCTAGACTGGAGCAGCTTGACCTGG ( <i>Xba</i> I)      |
| For overexpression of <i>wblE</i>  | wblE-E-Fw                          | CGGAATTCGAGTCTCTACGTGGCGATCG ( <i>Eco</i> RI)    |
|                                    | wblE-E-Rev                         | GCTCTAGACCAAGCTCAGGCTCGTTGC ( <i>Xba</i> I)      |
| For construction of His-tagged Rex | His-rex-Fw                         | CATGCCATGGCAACTGGCCGAACTCAC ( <i>Nco</i> I)      |
|                                    | His-rex-Rev                        | CCCAGCTTGAAGGCGAGGATCTGGAGCTC ( <i>Hind</i> III) |
| For real-time RT-PCR               | hrdB-QP-Fw                         | TACTGCGCAGCCTCAACCAG                             |
|                                    | hrdB-QP-Rev                        | GCCGATCTGCTTGAGGTAGTC                            |
|                                    | hemA-QP-Fw                         | TCTCTACGTGCACTACGAGG                             |
|                                    | hemA-QP- Rev                       | GCGCGTCCTTGATCTGGC                               |
|                                    | atpI-QP-Fw                         | CCAAGTGCTTCGCCCTGAC                              |
|                                    | atpI -QP-Rev                       | GAGTCCGGCTCCACGTAGAGG                            |
|                                    | cydA1-QP-Fw                        | CTCACGCAGGTCTTCCACAC                             |
|                                    | cydA1-QP-Rev                       | AGCGAGGTCTTCATCACGGG                             |
|                                    | nuoA1-QP-Fw                        | GGAGATGCTGCTCTTCGTGC                             |
|                                    | nuoA1-QP-Rev                       | TCAGTCCCATTCCAGACCGC                             |
|                                    | wblE-QP-Fw                         | ATGGACTGGCGTCACAACG                              |
|                                    | wblE-QP-Rev                        | GGCTTCCTCGATCTGCAGC                              |
|                                    | aveR-QP-Fw                         | CAGAAGAACTCACGCTCGTC                             |
|                                    | aveR-QP-Rev                        | ACTCTTTCCACAGCCCATTC                             |
|                                    | aveA1-QP-Fw                        | CGGACAGGACTACGCACTTC                             |
|                                    | aveA1-QP-Rev                       | ACGAGATACGACCGGAGATG                             |
|                                    | aveD-QP-Fw                         | GGACTACTACGACCGTTTGACC                           |
|                                    | aveD-QP-Rev                        | CTCAGCTTGCCGATGAGGAG                             |

| Purpose                 | Primer          | Sequence (5'--3') <sup>a</sup> |
|-------------------------|-----------------|--------------------------------|
|                         | olmRI- QP-Fw    | GAGAGAAGGCACACGAGGTC           |
|                         | olmRI- QP-Rev   | ATGTTCGAGTAAGCGGGAGAG          |
|                         | olmRII- QP-Fw   | GGAGGAACTCAGCCTCGACT           |
|                         | olmRII- QP-Rev  | ATCTCCCAGCCGATCTTCAC           |
| For EMSA and ChIP assay |                 |                                |
|                         | rexp-Fw         | GAGTAGTCCAAACAGCCCGG           |
|                         | rexp-Rev        | CAGTTGCCACGGTGCTCCT            |
|                         | atpIp-Fw        | CGGTGTCATCTCGCTGAGC            |
|                         | atpIp-Rev       | GGTGGGCAGAGCACAGTG             |
|                         | cydA1p-Fw       | CGTTGTCCAGGTGTTCTACGC          |
|                         | cydA1p-Rev      | GGTGGTGATGCCGAAGTGC            |
|                         | nuoA1p-Fw       | GCTTCATGATCCTTCGCCAG           |
|                         | nuoA1p-Rev      | TTCACGCTCCTCGCTCCTC            |
|                         | wblEp-Fw        | GAGTCTCTACGTGGCGATCG           |
|                         | wblEp-Rev       | TCCATGGCTGCTACCTCTCC           |
|                         | aveRp-Fw        | GATGGCCTTCTCCTCCGG             |
|                         | aveRp-Rev       | CGTGAGTTCTTCTGGTTTCCG          |
|                         | aveD-A1p-Fw     | CCGTCCATCCTCTGCACCTG           |
|                         | aveD-A1p-Rev    | GCTGTTCGTGGCGATCTACTCC         |
|                         | olmRIp-Fw       | CCGCACCCTCCCGACCTG             |
|                         | olmRIp-Rev      | GACCTCGCCCAATCAGCACC           |
|                         | olmRIIp-Fw      | AATTGCTGGCCGAAGCCC             |
|                         | olmRIIp-Rev     | CGAGGACCACACCGCCTT             |
|                         | amfRp-Fw        | GGTCAAGGCTCCCTCCTG             |
|                         | amfRp-Rev       | CATTGTTGGCGGATGCGAC            |
|                         | amfTp-Fw        | GAGCGATTTGAGGGCAAGTT           |
|                         | amfTp-Rev       | GTCGGGCGTCTCGTAGAAG            |
|                         | bldMp-Fw        | CGGGAAGGCGAGAGAAATCT           |
|                         | bldMp-Rev       | CAGACGAGGACGGATGTCA            |
| For footprinting assay  |                 |                                |
|                         | rexp-FAM-Fw     | GAGTAGTCCAAACAGCCCGG           |
|                         | rexp-Rev        | CAGTTGCCACGGTGCTCCT            |
|                         | aveRp-FAM-Fw    | CCTCTGGACCCTTGCTCG             |
|                         | aveRp-FAM-Rev   | CGTGAGTTCTTCTGGTTTCCG          |
|                         | aveD-A1p-FAM-Fw | CCGTCCATCCTCTGCACCTG           |
|                         | aveD-A1p-Rev    | GCTGTTCGTGGCGATCTACTCC         |
|                         | olmRIp-FAM-Fw   | CCGCACCCTCCCGACCTG             |
|                         | olmRIp-Rev      | GACCTCGCCCAATCAGCACC           |
|                         | cydA1p-FAM-Fw   | CGTTGTCCAGGTGTTCTACGC          |
|                         | cydA1p-Rev      | GGTGGTGATGCCGAAGTGC            |
|                         | atpIp-FAM-Fw    | AGTCCGGGCAGGGTTTCTAC           |
|                         | atpIp-Rev       | GGTGGGCAGAGCACAGTG             |
|                         | nuoA1p-FAM-Fw   | CTCGGATGCTTCGCGTATGA           |

| <b>Purpose</b>   | <b>Primer</b>            | <b>Sequence (5'--3')<sup>a</sup></b>    |
|------------------|--------------------------|-----------------------------------------|
| For 5'RACE assay | nuoA1p-Rev               | TTCACGCTCCTCGCTCCTC                     |
|                  | oligo (dT)-anchor primer | GACCACGCGTATCGATGTCGACTTTTTTTTTTTTTTTTT |
|                  | sp1-rex                  | GATCACAACCGGCCAGTCCT                    |
|                  | sp2-rex                  | ACGAGAAGTCCTTGCGCAGC                    |
|                  | sp1-aveD                 | GTGATGCCTCTCAGCTTGCCG                   |
|                  | sp2-aveD                 | TGCGGCCAGTATCCGAGGTG                    |
|                  | sp1-aveA1                | GATCATGACGGCGAACAGGGT                   |
|                  | sp2-aveA1                | AGTTCCCTTCCCATGCCCGG                    |
|                  | sp1-olmRI                | TCGTCCGGGAAAGGAGCCC                     |
|                  | sp2-olmRI                | CAGGATCTCGCTCTTGCCGC                    |

<sup>a</sup>The restriction enzyme sites are underlined.

**Fig. S1**

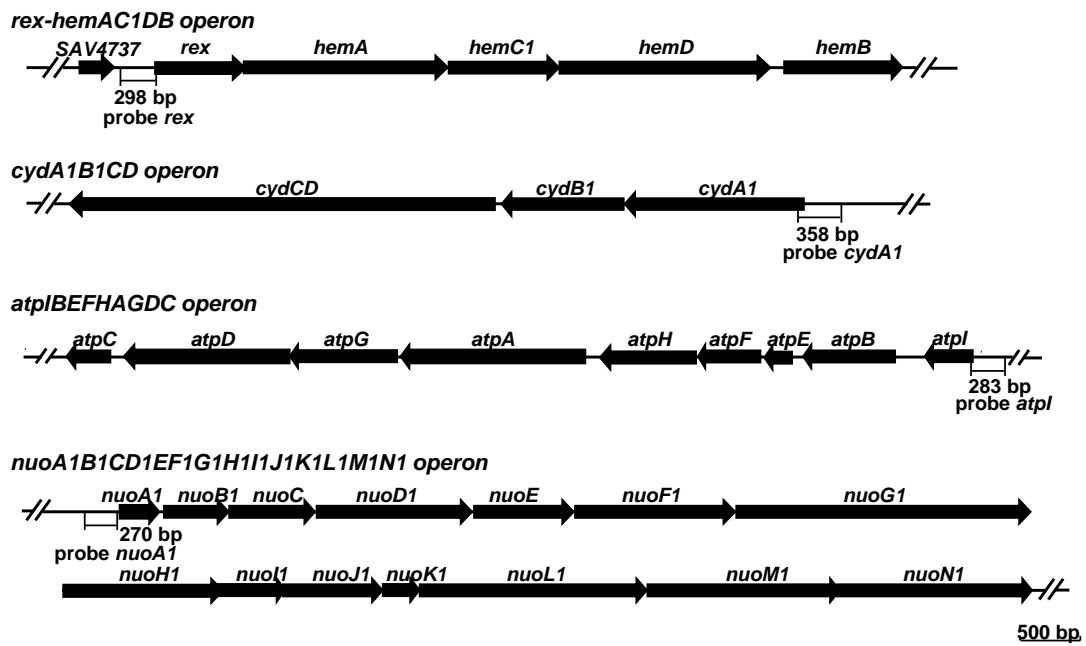

**Fig. S1. Organization of *rex-hemAC1DB*, *cydA1B1CD*, *atpIBEFHAGDC*, and *nuoA1-N1* operons in *S. avermitilis*.** Gene notations are based on the Genome Project of *S. avermitilis* (<http://www.ls.kitasato-u.ac.jp/>). Lengths and positions of probes used for EMSAs are shown.

**Fig. S2**

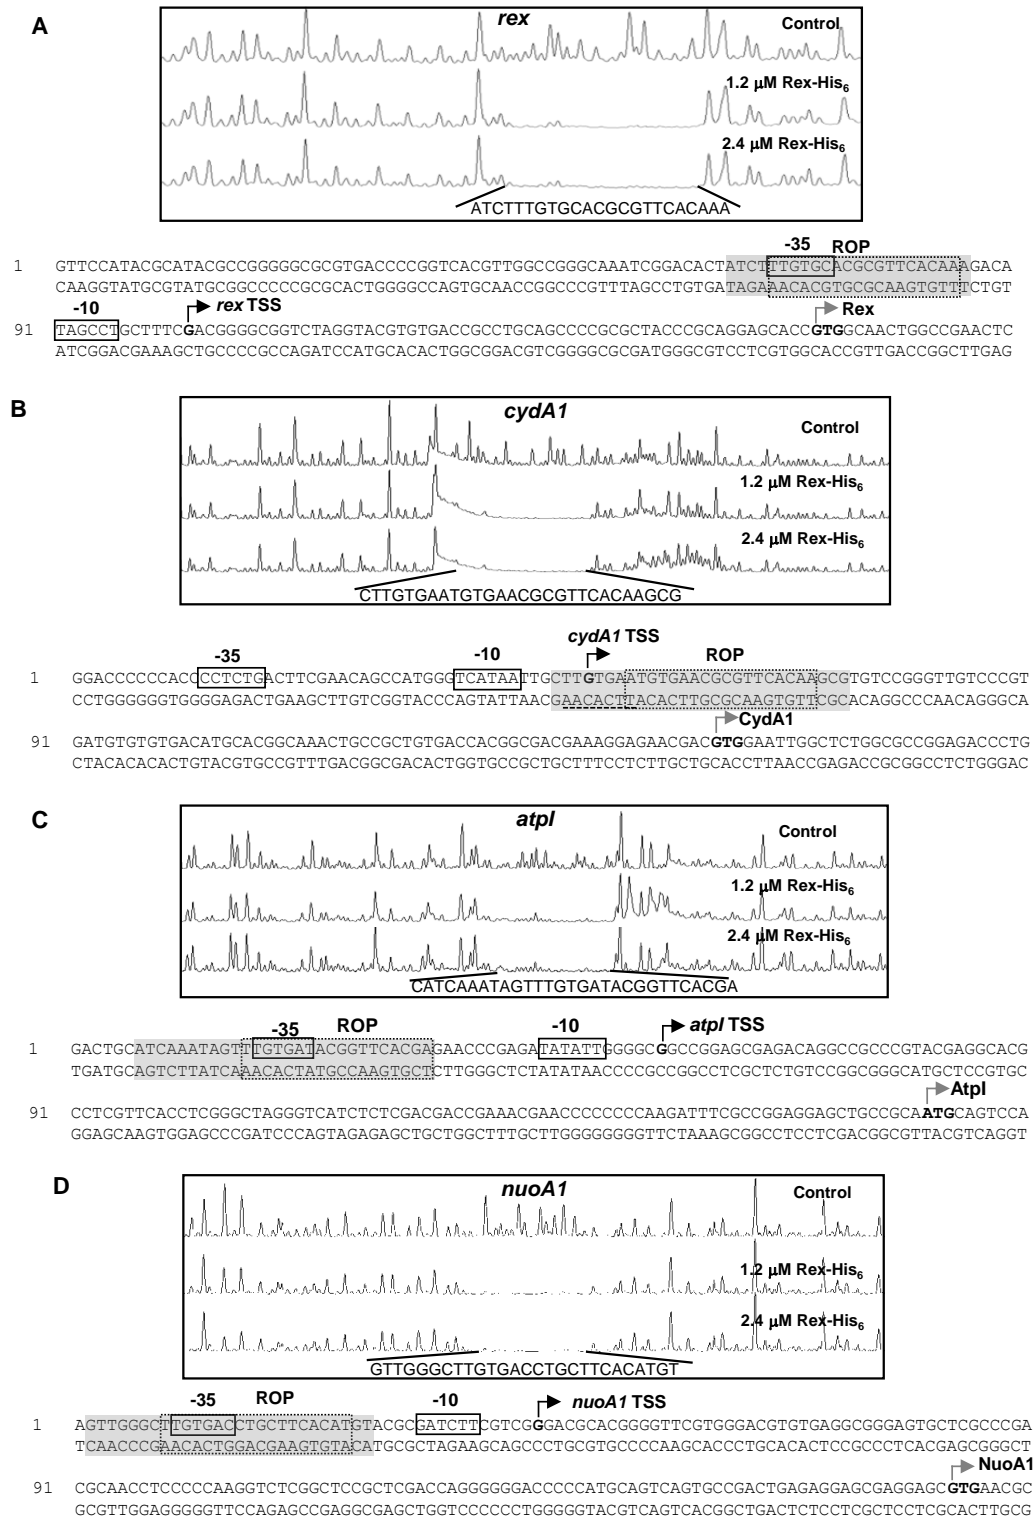

**Fig. S2. Determination of Rex binding sites on promoter regions of *rex* (A), *cydA1* (B), *atpI* (C), and *nuoA1* (D) by DNase I footprinting assay.** Fluorograms correspond to control DNA fragment and to protected reactions (with 1.2 and 2.4  $\mu\text{M}$  Rex-His<sub>6</sub>). Nucleotide sequences of *rex*, *cydA1*, *atpI*, and *nuoA1* promoter regions are shown below fluorograms. Notations as in Fig. 7.

**Fig. S3**

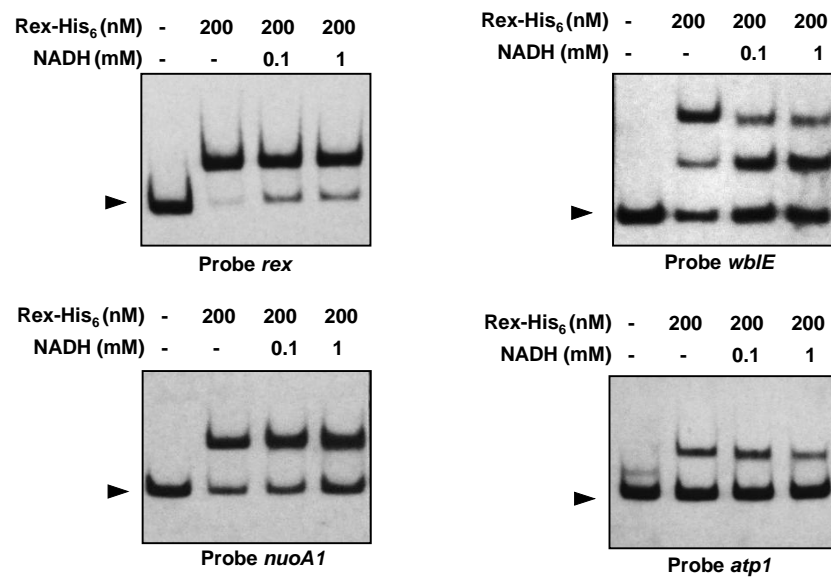

**Fig. S3. DNA-binding activity of Rex is inhibited by NADH.** EMSAs of promoter regions of *rex*, *wblE*, *nuoA1*, and *atpI* using Rex-His<sub>6</sub> and NADH. Arrow: free probe.

**Fig. S4**

**A**

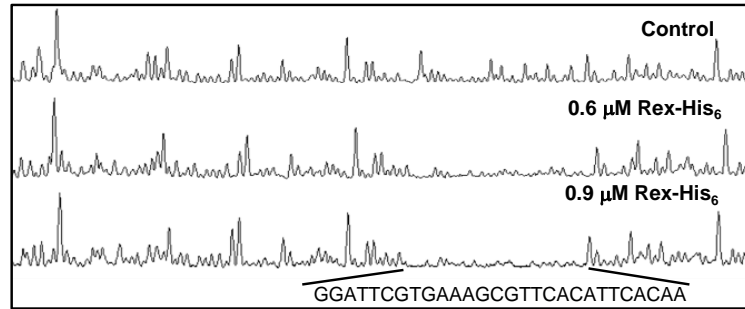

**B**

1 ACCCCATGGAAGTACGGCTGTGACCTAGTCGACACCGAGGAATCAAAAAAACTTCCGGAAGG **-35** GGTTGTATCCGCCGCT  
TGGGGTACCTTCATGCCGACACTGGATCAGCTGTGGCTCCTTAGTTTTTTTTGAAAGGCCTCCCCAACATAGGGCGCA

81 GAGGTTTGC **-10** GAGTCTCTACCT **▶▶ *wbIE* TSS** TGCGATCGAGACGGCCGCAACACCGGCCTCCACAGAGAGCCAGAACCCCTCCTCAATC  
CTCCAACGCTCAGAGATGCACCGCTAGCTCTGCCGGCGTGTGGCCGGAGGTGTCTCTCGGTCTTGGGGAGGAGTTAG

161 CAAAGGACCACGTCAGTCCGTCTGACGATCGGCCCTTCACTTGTGAGGGAT **ROP** TCGTGAAAGCGTTCACATTCACAAGCAA  
GTTTCTGGTGCAGTCAGGCAGACTGCTAGCCGGGAAGTGAACAACCTCCCTA AGCACTTTCGCAAGTGTAGTGTTCGTT

241 CCTGAATGTAATACCAAGGAGAGGTAGCAGCC **▶ *WbIE*** ATGACTGGCGTCACAACGCCGTTTGCCGCGAGGAAGACCCCGAGCTC  
GGACTTACATTATGGTTCTCCTCCATCGTCGGTACCTGACCGCAGTGTTCGGCAACCGGCCTCCTTCTGGGGCTCGAG

**Fig. S4. Determination of Rex binding site on *wbIE* promoter region by DNase I footprinting assay.** (A) Fluorograms correspond to control DNA fragment and to protected reactions (with 0.6 and 0.9  $\mu\text{M}$  Rex-His<sub>6</sub>). (B) Nucleotide sequence of *wbIE* promoter region. Notations as in Fig. 7.



**Fig. S5**

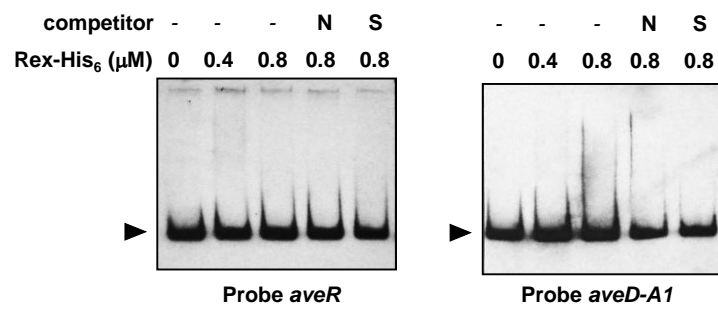

**Fig. S5. Binding of Rex-His<sub>6</sub> to *aveR* promoter region and to *aveD-aveA1* intergenic region.** Arrow: free probe. Specificity of band shifts was verified by adding 200-fold excess of unlabeled non-specific competitor DNA (N) and unlabeled specific probe (S).
